# Supplementary material
Source: PubMed Central journal article supplement (PMC3624169)
Supplement: MCB.01124-12_zmb999109952so1.pdf [file MCB.01124-12_zmb999109952so1.pdf]

## Supplemental Figure Legends

### **Supplemental Fig. 1. Genome-wide method for DNA methylation analysis using custom-design microarray in combination with methylated CpG island amplification (MCAM).**

(A) Schematic of MCAM design. Agilent microarrays spotted with 244K oligonucleotide probes were designed to cover >80% of predicted *SmaI/XmaI* intervals up to 1.5 kb in size. These intervals (highlighted in orange) were annotated for their distances to known genes, CpG islands (CGIs) and repetitive sequences. Gene annotations were based on NCBI RefSeq (Jul 2008). CGIs were defined as at least 500bp long with GC content above 55% and CpG ratio above 0.65. Repetitive regions were masked in the genome downloaded from UCSC genome database using RepeatMasker (versions: RepBase Update 9.11). (B) Distributions of MCAM coverage across the gene body. Based on the genomic interval location relative to transcription start site (TSS) and transcription end site (TES), regions analyzed by MCAM were grouped into four categories: promoters; intragenic; 3' end and intergenic. Promoter refers to genomic interval located within 1kb upstream of TSS to 300bp downstream of TSS; 3' end is located within 1kb upstream to 300bp downstream of TES; intragenic is defined as within the gene transcripts, but neither promoter nor 3' end; all others are intergenic. Numbers of regions analyzed in each category are indicated. (C) Experiments to validate the MCAM performance. The experimental procedures have been described in detail previously (1). A female-female comparison of MCA products generated from peripheral blood lymphocytes (PBL) showed little difference (the correlation between these two individuals was 0.98, panel 1), indicating the arrays are reproducible. Using MCA products generated from normal male and female PBL, the genes on the X chromosome in female PBL were significantly hypermethylated compared with the same regions on male X chromosome (panel 2). Thus, MCA performs well, even in a situation where only 50%

methylation is expected. We then compared microarray results with quantitative bisulfite-pyrosequencing results for over 200 data points, and found a good correlation between these two independent methods (correlation was 0.87, panel 3).

**Supplemental Fig. 2. Characterization of genomic regions undergoing methylation changes during differentiation of hESCs.** (A) Genomic intervals are divided based on their association with CGIs as well as methylation changes during induced differentiation in hESCs. They are further subdivided based on their locations relative to genes. Within each bar, the relative proportions of regions enriched for H3K4me3/H3K27me3, H3K4me3 only, or H3K27me3 only are indicated. Relative to those in which methylation did not change, CGI-associated genomic intervals that gained methylation upon differentiation are enriched for the bivalent chromatin domain (H3K4me3/H3K27me3) ( $P < 0.0001$ ). (B) GO analysis of genes associated with CGIs that gained methylation during induced differentiation identifies a preponderance of developmental processes. For each significant GO term, the FDR adjusted  $P$ -value is indicated.

**Supplemental Fig. 3. Methylation status of all CGIs located within the selected genes.** DNA methylation was measured quantitatively at either 5' CGI (green) or 3' CGI (purple) for two classes of genes. Gene IDs are indicated on top of each graph. X-axis indicates differentiation status. Y-axis indicates methylation level. Values are given as means and standard deviations of results from more than two biological replicates.

**Supplemental Fig. 4. Evolutionary conservation of *Hic1* gene locus.** 6 kb of mouse and human *HIC1* sequences (from -670 bp, the start of *HIC1* transcription) were compared using

VISTA (<http://www-gsd.lbl.gov/vista>) (2) and a 100-bp window length. Human sequence is displayed on the x axis and percentage identity with mouse sequence is indicated on the y axis. Shaded areas represent regions with 75% or higher sequence identity.

## Reference

1. Shen, L., Kondo, Y., Guo, Y., Zhang, J., Zhang, L., Ahmed, S., Shu, J., Chen, X., Waterland, R. A., and Issa, J. P. (2007) Genome-wide profiling of DNA methylation reveals a class of normally methylated CpG island promoters, *PLoS Genet* 3, 2023-2036.
2. Mayor, C., Brudno, M., Schwartz, J. R., Poliakov, A., Rubin, E. M., Frazer, K. A., Pachter, L. S., and Dubchak, I. (2000) VISTA : visualizing global DNA sequence alignments of arbitrary length, *Bioinformatics* 16, 1046-1047.

**A** DNA methylation custom array design

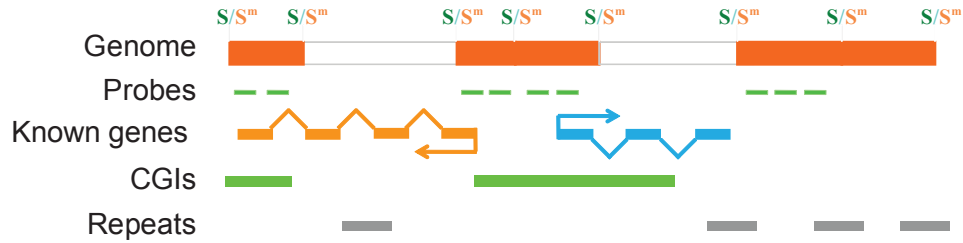

**B** Distribution of regions analyzed by MCAM

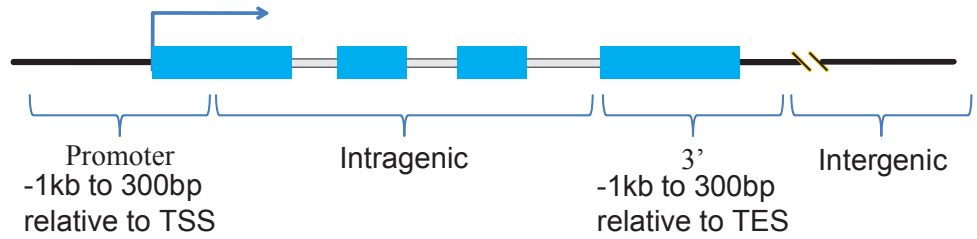

83927 total intervals

|                 |       |       |      |       |
|-----------------|-------|-------|------|-------|
| CGI (32301)     | 14487 | 9843  | 1335 | 6636  |
| non-CGI (51626) | 1387  | 26721 | 1998 | 21520 |

**C** Validations of MCAM performance

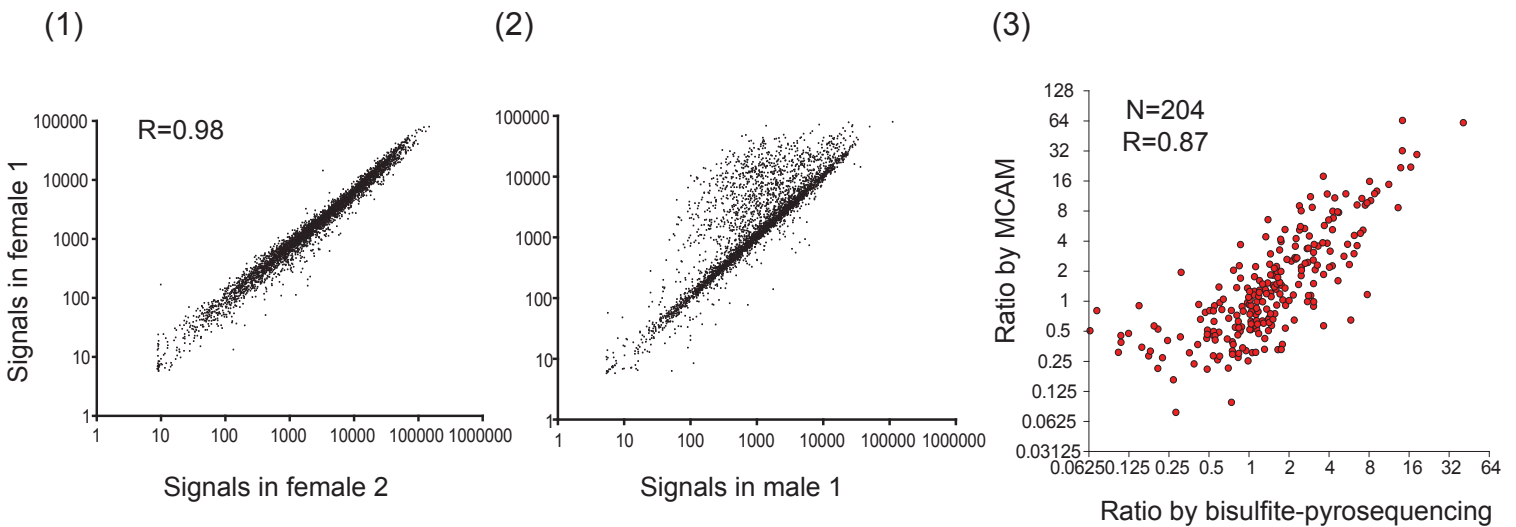

A

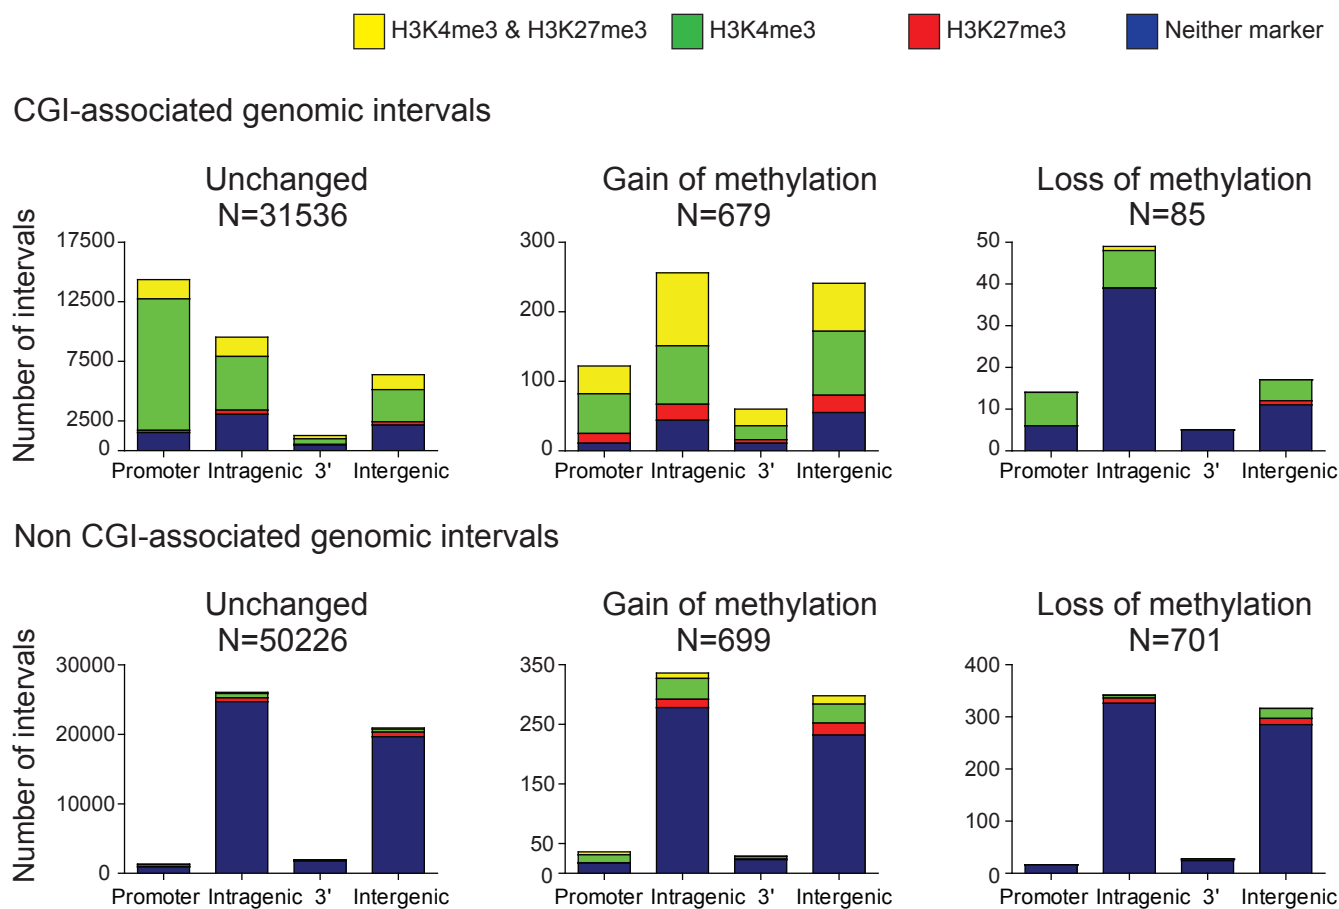

B

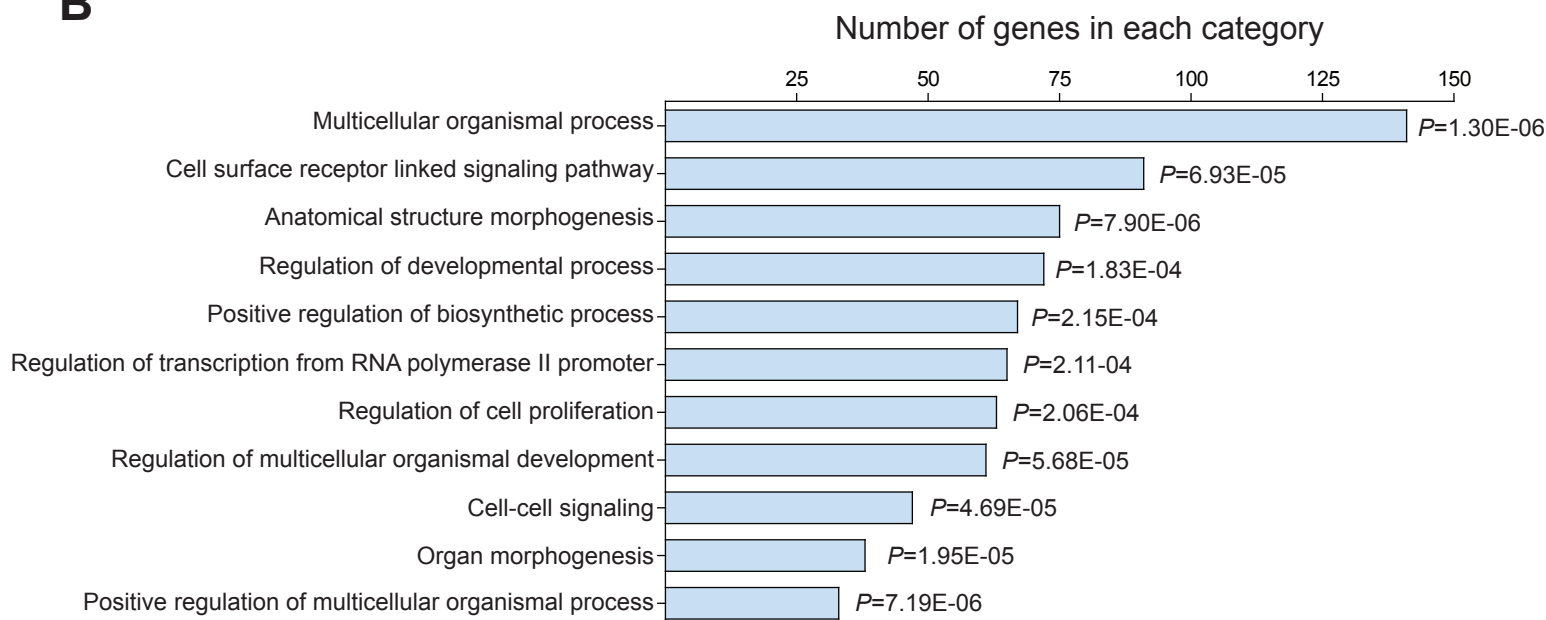

**A** 5' CGI associated gene

*RBM38*

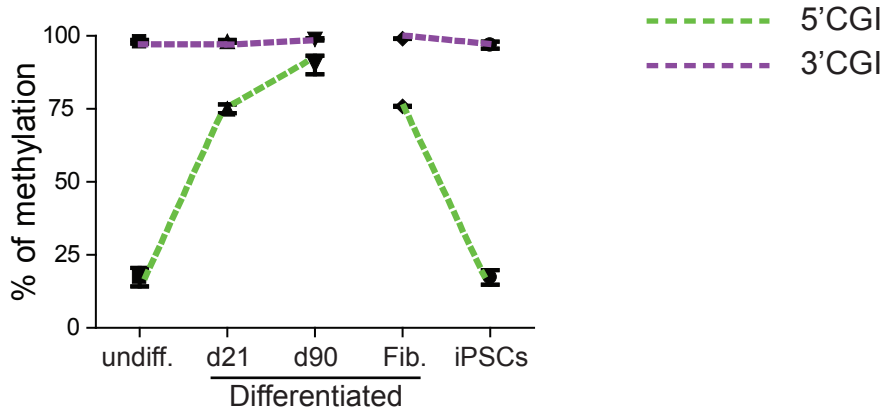

**B** 3' CGI associated genes

*PRR15*

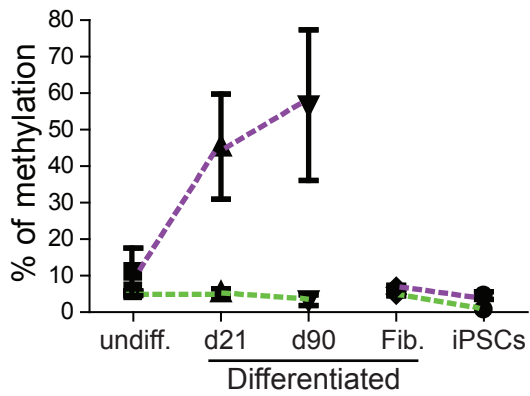

*HIC1*

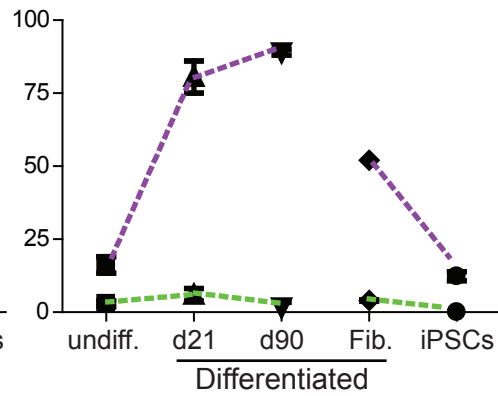

*HOXC5*

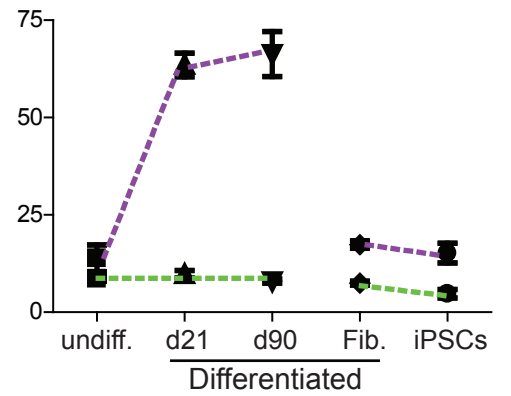

Alignment 1  
 sequence1  
 mhic1 (-)  
 90-6211  
 Criteria: 70%, 100 bp  
 Regions: 13

X-axis: Human Mar. 2006  
 Resolution: 1  
 Window size: 100 bp

- ← contig
- gene
- exon
- UTR
- CNS
- mRNA

- Repeats:
- LINE
  - LTR
  - SINE
  - RNA
  - DNA
  - Other

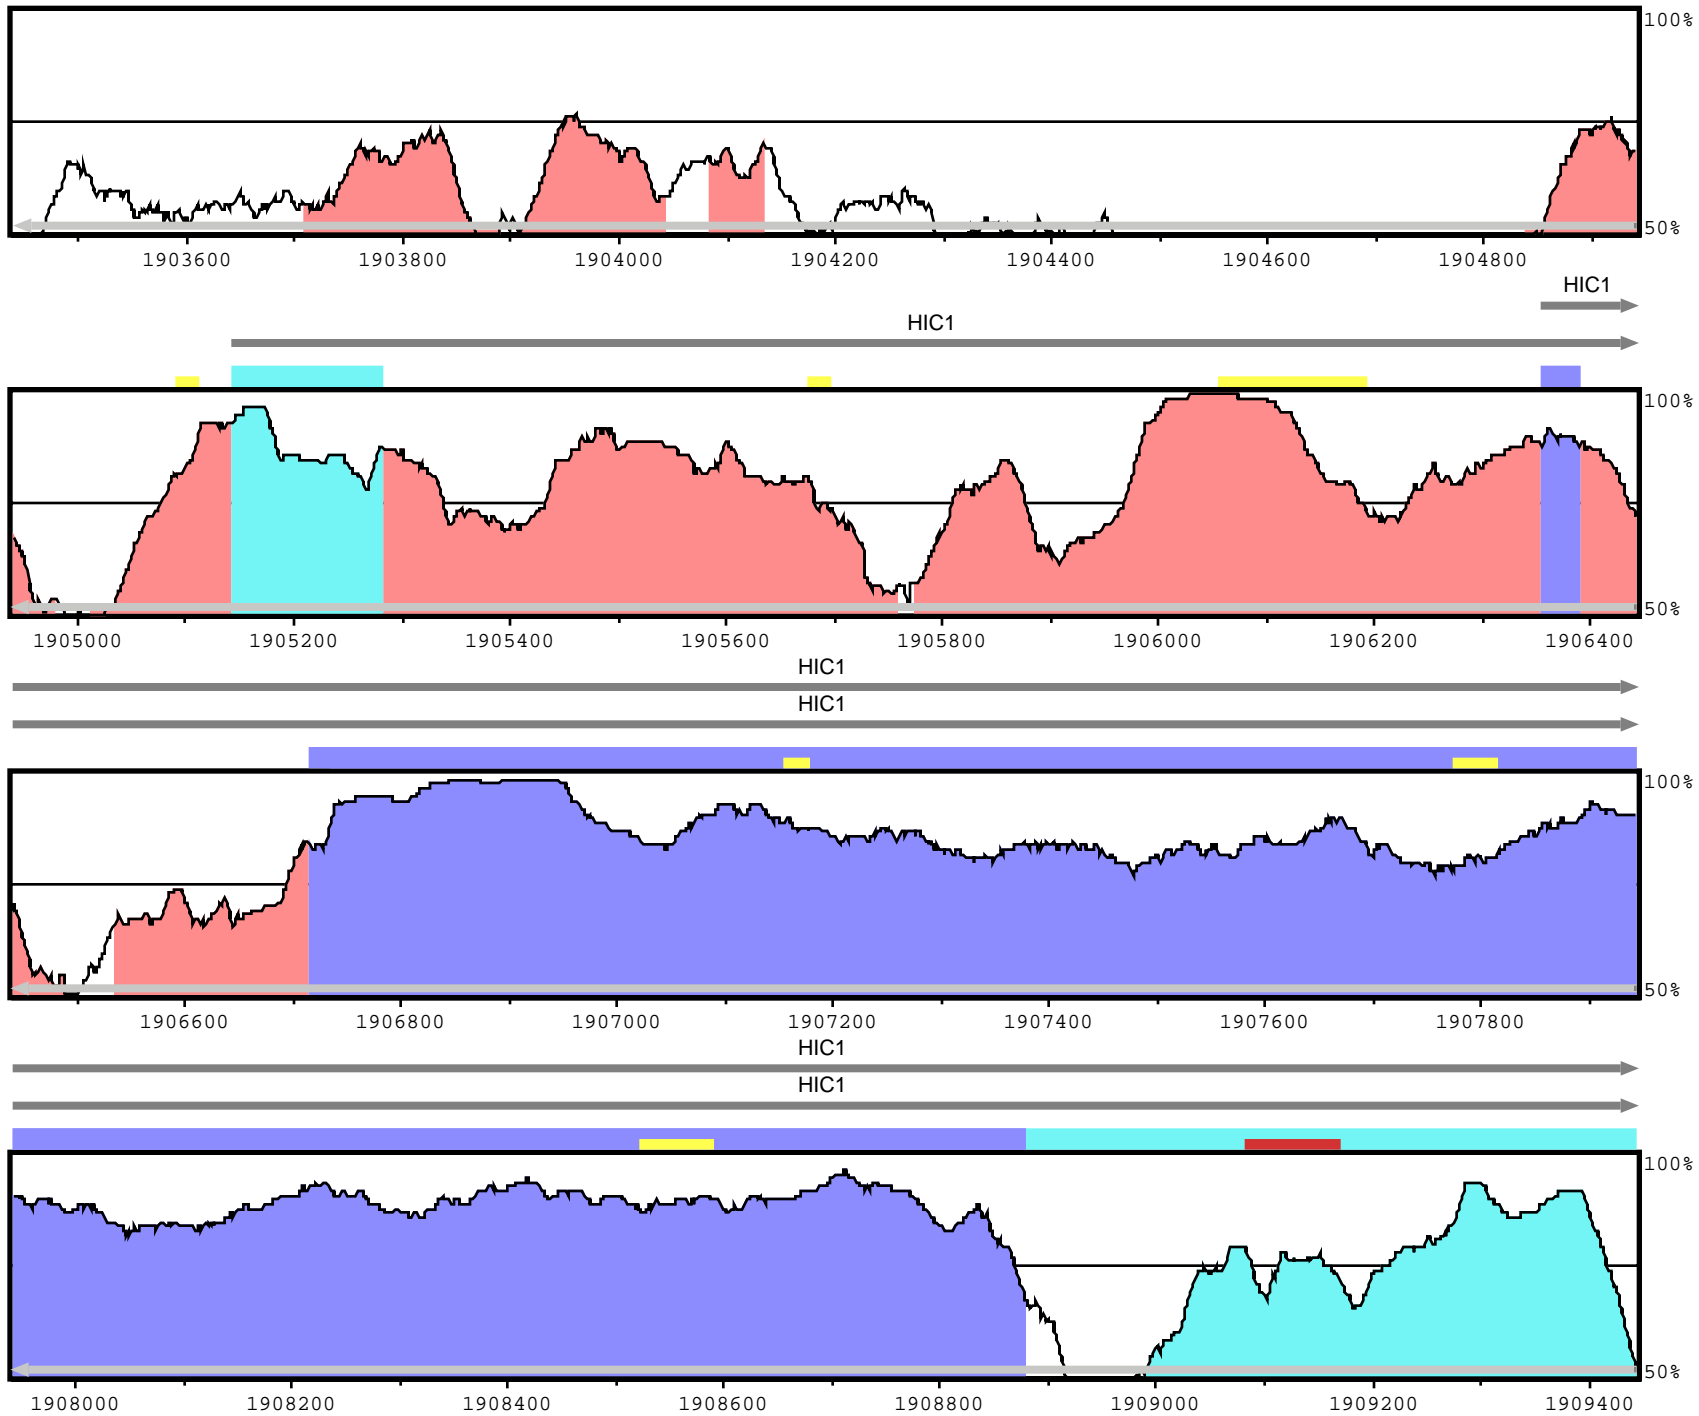

Supplemental Table 1. Primer sequences, PCR conditions, and assays for quantitative DNA methylation analysis by bisulfite-pyrosequencing

| ID      | Description                               | Accession No. | CpG island location | PCR conditions                 |                                |
|---------|-------------------------------------------|---------------|---------------------|--------------------------------|--------------------------------|
|         |                                           |               |                     | Forward primer                 | Reverse primer                 |
| ALOX12  | Arachidonate 12-lipoxygenase              | NM_000697     | Promoter            | GGAGATTTYGGGAAGTGTTTTATTTATG   | CAAATCCCCRCCCCAAACTAACC        |
| CMYA5   | Cardiomyopathy associated 5               | NM_153610     | Promoter            | GGTTAGAGTAGTYGGAGGGAGAATAT     | CTAACTACCCTACAAACCCTAAAC       |
| RBM38   | RNA-binding region containing protein     | NM_017495     | Promoter            | TTTAGAGGTGGAGGGTGTGATT         | AAACCCCTTATTCAAAAATAAAAATT     |
|         |                                           |               | 3' end              | GTGTAGTTTATAGAGTGGTATTTTAG     | AACCCCTTACTACTACCTATCAAAA      |
| REC8L   | Meiotic recombination protein REC8-like 1 | NM_001048205  | Promoter            | GTTTTTATTGGTTGTTAGGGTAA        | CRATATCAAACCCCTAAACCTTAC       |
| TCL1A   | T-cell lymphoma-1                         | NM_001098725  | Promoter            | GTGGGTTTTGGTTTTGGGTATT         | AAACCCRACCCCAACTAACC           |
| MAP7D1  | MAP7 domain containing 1                  | NM_018067     | Intragenic          | GTGTTTGYGTGGGTGTGTTGA          | AAAACCCCTCAATCCCC              |
| PCDH8   | Protocadherin 8 isoform 1 precursor       | NM_002590     | Intragenic          | GGAGTTAAAYGGGAGTTGG            | CCCRCCCCCTACTATTACC            |
| TBX2    | T-box 2                                   | NM_005994     | Intragenic          | GGGTGGTTTTTTTGTGAGTTAT         | TAATCCAAAACCCCAAATTTACA        |
| BCL11B  | B-cell CLL/lymphoma 11B isoform 2         | NM_022898     | 3' end              | ATTAAGGTGGAGAAGGATTTGGA        | AAACCCAAAAAAAATCCTTCAT         |
|         |                                           |               | Promoter            | GGGTAGGGTGGGTTTTTTTT           | CTTTCCCCACACTCTTATCTAAAAC      |
| HIC1    | Hypermethylated in cancer 1               | NM_006497     | 3' end              | TAGAGGGGGAGGGGTGTTA            | TCCCCACTCCCCAACTCTA            |
|         |                                           |               | Promoter            | ATGGATAGGTTTTAGAGGTGTAGGTATTTA | TAATCTCCCCACTACTCTTAACTC       |
| HOXC5   | Homeobox C5                               | NR_003084     | 3' end              | GGTATTYGGGGTTTAGGGTAAGTT       | CAAACCTCTRCCAACCTTTAACT        |
| LASS1   | Longevity assurance gene 1 isoform 1      | NM_001492     | 3' end              | AGGGGTTTAGGTTTTGGTTTATG        | CCCRACCTACCCATAAAATCTC         |
| NOS3    | Nitric oxide synthase 3                   | NM_000603     | 3' end              | GGTTGTGATTGGGAGGAGAGTTAT       | CAAAAACCTTACACAACCCTAATT       |
| PCDHGC5 | Protocadherin gamma subfamily C           | NM_032407     | 3' end              | GGAYGGTAGTATTTTATTTTTTAAAGAT   | AAAATAAATACAAATCAATCCCTTATAA   |
| PRR15   | Proline rich 15                           | NM_175887     | Promoter            | GGGAGGTGTTAGTAGGGAAGAG         | CCCAACTAAATCAAATACTACTACTAATCT |
|         |                                           |               | 3' end              | GGGAAGGGGTGGAGTGAA             | CCCCCACTACCACTTCCTTACTTTT      |
| SEMA6C  | Semaphorin Y                              | NM_030913     | 3' end              | GGGAGGTTTTTTTAGGTATT           | CTCCCTTTAAAAATTAATAAC          |
| TMEM190 | Transmembrane protein 190                 | NM_139172     | 3' end              | GTGAGGGTTTTTGGTTTTAGGT         | CCAAAAACAAACAAATACTACAACCTCAA  |
| CNTFR   | Ciliary neurotrophic factor receptor      | NM_147164     | Intergenic          | GGGGTAGGGTAAGTTTTGTTTT         | CCCACACAAAAATATCCTCTCC         |
| LY6E    | Lymphocyte antigen 6 complex, locus E     | NM_002346     | Intergenic          | GTGTTTTGGGTTTGGAGTAGAGA        | ACRAAAAAAAAAAAAAACCCAATTC      |
| ALX3    | Aristaless-like homeobox 3                | NM_006492     | Intragenic          | GGGTAGGTAAAGGTTAGTGTG          | TCCTTCCCAATCCAACACTT           |
| GGN     | Gametogenetin                             | NM_152657     | Intragenic          | AGTTGTGTTGGGGATATGGGTAAG       | CRACTACAAATTCCCCATTTCTAA       |

\*: Universal Primer: GGGACACCGCTGATCGTTTA (Ref 9)



Continued Supplemental Table 1.

| ID      | CpG island |           |             |        | Pyrosequencing Assay 1 |                          |                                           |
|---------|------------|-----------|-------------|--------|------------------------|--------------------------|-------------------------------------------|
|         | location   | Biotin *  | Anneal (°C) | w DMSO | Amplicon (bp)          | Sequencing primer        | Sequence to analyze                       |
| ALOX12  | Promoter   | Regular   | 55          | no     | 239                    | GGGGTTTTAGGTTTAT         | TTYGATTTYGTTTTTYYGGGAGGTTTA               |
| CMYA5   | Promoter   | Regular   | 60/57/54/51 | no     | 276                    | GTAGTYGGAGGGAGAATATTAG   | GYGYGGYGYGGGYGGTTTTYGGTTT                 |
| RBM38   | Promoter   | Regular   | 55          | no     | 148                    | GGGGTTTGTGTAGTTAT        | AYGGTTTTTTTTTTTTYGTTTAGGAAAGTTYGGGG       |
|         | 3' end     | Regular   | 55          | no     | 278                    | GTTGTTTTAGTTTTATATTGA    | GTATAYGTYGGTTAGTTYGGTTTAYGTTTAGTATTTATYGG |
| REC8L   | Promoter   | Regular   | 60/57/54/51 | yes    | 162                    | YGATTTAGTTTTGTAGTAGG     | YGGTTYGGGGTTATATYGYGGTYGTT                |
| TCL1A   | Promoter   | Universal | 55          | no     | 234                    | TTTTAGTAGAGGTTTAGAGT     | TTYGGTTYGGTAGTYGAGGGAAGYGGG               |
| MAP7D1  | Intragenic | Universal | 60/57/54/51 | yes    | 275                    | GATTTTTAGTAAATTAATGG     | TYGGTATTATAGATYGAGAAGAAGTTATTYGGT         |
| PCDH8   | Intragenic | Universal | 60/57/54/51 | yes    | 236                    | GAGTTGTAGTAGTAGGA        | GTYYGYGYGAAGTTTTYGTATYGGT                 |
| TBX2    | Intragenic | Universal | 55          | no     | 253                    | GAAAGGTTAGGAAGGAAA       | YGTYYGGYAGTGTTTGGGAT                      |
| BCL11B  | 3' end     | Regular   | 60          | no     | 125                    | GTAGTGGTTGGTGGG          | TTAYGYGGYGTYYGGTATTTTA                    |
| HIC1    | Promoter   | Regular   | 55          | no     | 170                    | AGTATTTGTGAGTTTTTAGTTAGG | TGYGYGGGAGGAAGGTAGYGGTTTGTYYGYGTAG        |
|         | 3' end     | Regular   | 60/57/54/51 | yes    | 126                    | CAATAAAAAATAAATAAATC     | RCAAAAACCRAAAATAAAACTAAAAATACCCCRAC       |
| HOXC5   | Promoter   | Regular   | 55          | no     | 276                    | GGGTAGATATGGTTGTTAAT     | TTTTYGGGTTTATTTYGATYGTTTYGTTTGTAGYGT      |
|         | 3' end     | Universal | 55          | no     | 256                    | GAATTTTGGTTTGGGT         | YGTATTTTYGGTTTTTA                         |
| LASS1   | 3' end     | Universal | 55          | no     | 259                    | GTTTTATATTTTTTTTATAG     | AYGGTGYGTTTTYAGTTTTAGYGTTTA               |
| NOS3    | 3' end     | Universal | 50          | no     | 216                    | GGGTATGGAATTTTGAG        | TTYGAAGTYGYGTATTTTAGYGTAGTTT              |
| PCDHGC5 | 3' end     | Regular   | 55          | no     | 206                    | AGTTAGGTGAGGGGT          | TYGGYGTYYGTTTTYGGGYGATTTTTGGGGG           |
| PRR15   | Promoter   | Regular   | 55          | no     | 218                    | GGAAAGTAGTTTTGGATTTTTTAT | TYGGGTAGYAGGTTTGGYGGTTTTTYGTYGTYGTTT      |
|         | 3' end     | Regular   | 60/57/54/51 | yes    | 186                    | TGTYGGGAGTTTTTAGGTTT     | TTYGGTTATGGTYGATAGYGGYGAT                 |
| SEMA6C  | 3' end     | Universal | 55          | no     | 213                    | GAAGTATTTTTTGTATTTGG     | GTYYGGTYGAGGGTTATYGGGGT                   |
| TMEM190 | 3' end     | Regular   | 60          | yes    | 169                    | GTTTTAGGTTTTTGGGG        | YGTGGGTTTG YGGTYGGGAGTTTTYGGGTT           |
| CNTFR   | Intergenic | Universal | 60          | no     | 165                    | GGTAYGGGAAGTAGGAGGT      | YGGYGGTTTAGAGAGTTYGGGG                    |
| LY6E    | Intergenic | Universal | 55          | no     | 224                    | GAGGGAGAGGAAGAGAGT       | TTYGTTTTYGTTTTYGGGGTTTT                   |
| ALX3    | Intragenic | Universal | 55          | no     | 164                    | AAAGGTTAGTGTGGGG         | YGGGAGGGTGAATTATYGTTTTTYGGYGGYGGG         |
| GGN     | Intragenic | Universal | 55          | no     | 253                    | GGGATATGGGTAAGAAG        | GYGTGAGTGYGAAGGYGGGG                      |

Continued Supplemental Table 1.

| Pyrosequencing Assay 2 |                                             |                                                                                                                                    |
|------------------------|---------------------------------------------|------------------------------------------------------------------------------------------------------------------------------------|
| ID                     | Sequencing primer                           | Sequence to analyze                                                                                                                |
| ALOX12                 | GGAGGTTTAGGAAGGT                            | TTYGT <sup>Y</sup> GTATTTATTTY <sup>G</sup> TGTTGGTTTTATTTGGTTY <sup>Y</sup> GGGT                                                  |
| CMYA5                  |                                             |                                                                                                                                    |
| RBM38                  | GGTTATTTATGATTAGTATTTATA                    | YG <sup>T</sup> YGT <sup>T</sup> TYG <sup>T</sup> TTG <sup>T</sup> TTAYGG <sup>T</sup> TTG <sup>T</sup> TAG <sup>T</sup> TTYGTGGGT |
| REC8L                  | AGTYGTTATTTAATGAGGAG                        | YGAGGTG <sup>Y</sup> GGTGT <sup>T</sup> TYGAAG <sup>Y</sup> GTTYGTTTT                                                              |
| TCL1A                  | TTTTTAGTAGTAGTAGAGG                         | G <sup>Y</sup> GG <sup>Y</sup> GGT <sup>Y</sup> GGTGT <sup>Y</sup> GTTGTTGGT <sup>Y</sup> GGGGTTT                                  |
| MAP7D1                 | GGTTTTGGTTGAGAAG                            | YGG <sup>Y</sup> GTTAGGTT <sup>Y</sup> GGGAGTAG                                                                                    |
| PCDH8                  | GGGGGAGATATTGTTT                            | AT <sup>Y</sup> GG <sup>Y</sup> GATTTTT <sup>Y</sup> GTAGGAGTTA                                                                    |
| TBX2                   | GTTTGGGATGGGGTT                             | TTYGTT <sup>Y</sup> GGGATTTTT <sup>T</sup> AYGAG                                                                                   |
| BCL11B                 | GGAGAAGGATTTGGAGTT                          | GT <sup>Y</sup> GTT <sup>Y</sup> GTY <sup>G</sup> YGT <sup>T</sup> ATTT <sup>Y</sup> GTT                                           |
| HIC1                   |                                             |                                                                                                                                    |
| HOXC5                  | TGAATTTAGGGATGTATAGTTAGAA<br>GAGTTAAGGTGGGT | GGYGG <sup>T</sup> TYG <sup>T</sup> TYGGYGT <sup>T</sup> GGAGGAGYGAG <sup>T</sup><br>YGGT <sup>Y</sup> G <sup>Y</sup> GTTATAGGATT  |
| LASS1                  |                                             |                                                                                                                                    |
| NOS3                   |                                             |                                                                                                                                    |
| PCDHGC5                | GTTTAGTAGTTTATAGTTTT                        | GG <sup>Y</sup> GTTGGAGTTTGA <sup>Y</sup> GTTATT <sup>Y</sup> GGTT <sup>Y</sup> GTTTTAA                                            |
| PRR15                  | AAGGGGTGGAGTGAA                             | YGG <sup>T</sup> YGGAGATTAYGTGGAGAAAGGGGT <sup>Y</sup> GTT                                                                         |
| SEMA6C                 | TTTGAAAAGGGTGGA                             | YGT <sup>Y</sup> GAGAAGTTT <sup>T</sup> AGTTGTTTTTGA                                                                               |
| TMEM190                | TTAATTTTGT <sup>T</sup> TTTTTTGTTTAGAA      | AA <sup>Y</sup> GTG <sup>Y</sup> GGAGGAAGTATATGTGGG <sup>Y</sup> GTTG                                                              |
| CNTFR                  | GTTTTGTTTTTTTTAAGATT                        | TYGT <sup>Y</sup> GTAAYGTTTT                                                                                                       |
| LY6E                   |                                             |                                                                                                                                    |
| ALX3                   | AGGGAAGGTGTAGTGG                            | YGA <sup>Y</sup> GGT <sup>Y</sup> GGAGTTTAG                                                                                        |
| GGN                    | TTTTGGAGAATAGGGG                            | YGGGG <sup>T</sup> YGGT <sup>Y</sup> GGAYGTATTAGATT                                                                                |

Supplemental Table 2. Primer sequences for bisulfite cloning and sequencing at *PRR15* gene locus

| Primer Sets | Distance from TSS (bp) |         | Forward primer            | Reverse primer            |
|-------------|------------------------|---------|---------------------------|---------------------------|
|             | CpG_start              | CpG_end |                           |                           |
| 1           | -359                   | -26     | GGTAAATAGYGGATTTGTTAATTA  | CCACCCTCCAAAAAAAAAAAAATTA |
| 2           | -214                   | 64      | ATGGGGTTAAGGGATAGTTGTTG   | AACCAAAACCCTAAAACAATAAAA  |
| 3           | 149                    | 381     | GGAGTGAATAGTTAGGGTTTTATT  | TAATCTCCTCTAACACCTCCAATT  |
| 4           | 358                    | 621     | AATTGGAGGTGTTAGAGGAGATT   | ACCCCRAAACCAAACTCTAT      |
| 5           | 622                    | 914     | TATTTTGGGGTGTTGTTTGGTAT   | ATCCCATTCCCTCCTACTTTACAA  |
| 6           | 899                    | 1125    | TAGGAGGGAATGGGATGTTTGTA   | CCRCAAAAAAAAAAAAAATCTAATC |
| 7           | 1120                   | 1394    | TGGYGGTTTTYGGGAGGAGAATT   | AAACTTCTAAAACCCCCCTCTAC   |
| 8           | 1366                   | 1643    | GTTTTGTAGAGGGGGGGTTTTA    | TTACTCCCCAAAACCCAATCTTAC  |
| 9           | 1834                   | 2188    | YGATGGGGGTAAATTTTGGAG     | TTCCAAAACACCATCACCTAATC   |
| 10          | 2171                   | 2318    | GGTGATGGTGTTTTGGGAAGATATT | CAATCCCCTTTCCTCCCTTATACT  |
| 11          | 2487                   | 2690    | TTGGGTGTYGGGAGTTTTTAGG    | CCCRAAACTACTAATCCAATCC    |
| 12          | 2469                   | 2720    | YGTTTYGAGGAGATTGGGGTGTT   | CCRCTTTAACCCTTCCATCTAAAT  |
| 13          | 2729                   | 2900    | TGTTTTYGTGGGGTTATTAGGAA   | CCCCCAAACCAAACAATTAAT     |
| 14          | 3696                   | 4122    | AGGAAGGGAGAGAGGTATTAATT   | AATCTCCTTCAAATACCCAAACT   |

Supplemental Table 3. Primer sequences for bisulfite pyrosequencing at mouse *Hic1* gene locus

| Primer Sets | Distance from TSS (bp) |         | Forward primer                 | Reverse primer                 |
|-------------|------------------------|---------|--------------------------------|--------------------------------|
|             | CpG_start              | CpG_end |                                |                                |
| 1           | -674                   | -637    | GGTGGATTTTATAATTTTGGAGTTTATAGG | AAACATCAAAAACACCCTTACTTA       |
| 2           | -540                   | -490    | GGTAGGGTTTTTAGTTGTATTAGTGAGA   | CAAAAATACCAAATACCTCTTCACTT     |
| 3           | -359                   | -247    | GGGGTTTAGAGTTATTATGGTAATTAATGA | CCAAAACCTTAATATCTCACTAATACAA   |
| 4           | -25                    | 152     | GAGTTTTTTATTGGAAATAGTTGGATAGAG | ATTTAAAAAAACCCCCCTATAAC        |
| 5           | 329                    | 408     | ATTATTTATTTGGATTTAGTGGAGAGAGA  | ACAAACTAAAATCCCTCAAACTACT      |
| 6           | 553                    | 573     | TGGAAGTAAGAGGATTAGGAGTTTAAG    | ATCTCTCTCCACTAAATCCAAATAAATA   |
| 7           | 813                    | 847     | GAGGTTTGTAGATGAGGAGTTGAGTAGATT | ACCTTAAACTCCTAATCCTCTTACTT     |
| 8           | 1040                   | 1074    | AGGATTTATTTGGGGGGTATG          | CTACTCAACTCCCCATCTACAAACCTCTT  |
| 9           | 1342                   | 1366    | GTGTTAGGGTAGAGTTTTTGTAGTT      | CATACCCCCCAAATAAATCCT          |
| 10          | 1548                   | 1703    | TGGTGGTAGTGGGGATTTATATTA       | ACAAAAACCCTACCCTAACACAACCTC    |
| 11          | 1797                   | 1993    | GGGGAGTTAAGTAGTTTTTGGGG        | CCACTACCACCAAACCTACTAAAATT     |
| 12          | 2145                   | 2168    | ATAAGGAAGAAGGGAGTAAGATGTTTAT   | CCCACCTACTTCCTACCT             |
| 13          | 2261                   | 2284    | TGGGAATTTTTAGGGAGAAATTTGT      | CATCTTACTCCCCCTCTTCCTTATCACTT  |
| 14          | 2730                   | 2763    | TTTTGGTGAGTTGATTGTTGAGTTGTA    | TCAAACCCTAATACTCCATACCCTAATC   |
| 15          | 2851                   | 2881    | GGTTTAGGTTTAGTAGGTTGTTATGTAT   | CAACAATCAACCCACCAAAAACCTTCTTA  |
| 16          | 2946                   | 2957    | GTAGGTAGTTGGTAGTAGTTAGTATAG    | ACAACCCCTACCTCAAATCCCTAATAAT   |
| 17          | 3285                   | 3319    | TTGTTGGGTTAGGGTTTGAAGTATA      | ACTAACTACTACCAACTACCTACA       |
| 18          | 3364                   | 3502    | GTTTTTTTTAGTTTTTGGAAAGGGTAAAG  | ACACCCACTACCCTAAACTATATACTTCAA |
| 19          | 4394                   | 4421    | TTGATGAGGTTGAGTTGTTGAGTAAAT    | AACCACTTAAACCTAAAACCCTTTAC     |
| 20          | 4525                   | 4603    | AGTTGTGAGGAGGGTTATAGTAAAGA     | TCAACAACCCAACCTCATCAACCATATAAA |
| 21          | 4821                   | 4859    | GTGTAGAAAAGGTGGGGTTATTAT       | AACCTCTACCCCTAACTAAATTCACT     |
| 22          | 4919                   | 4947    | TGAGGTTAGGTGAGGTGTAGA          | CCCCCTCACAACCTAAACAACCTAAATCT  |
| 23          | 5171                   | 5206    | AGTAGGGAGATTTATAGTGAGAATG      | CCTACCTCTCCCTATAACTCATT        |
| 24          | 5288                   | 5327    | AGGAAGAGGAGGGGATATTT           | CACCCATTCTCACTATAAATCTCCCTACTA |

Supplemental Table 4. Primer sequences for real-time CTCF ChIP assays

| <b>Region analyzed</b>              | <b>Chr. Location</b>        | <b>Forward primer</b>   | <b>Reverse primer</b> | <b>Probe</b>      |
|-------------------------------------|-----------------------------|-------------------------|-----------------------|-------------------|
| PRR15_ 3' CpG island                | chr7:29,606,201-29,606,259  | CGCCGCAATTTGAAGATCTC    | GCGCGCACTTTCCTCTTCT   | CGGCCGCTTTAAG     |
| HOXC5_3' CpG island                 | chr12:54,428,088-54,428,153 | AGTTACACGCGCTACCAGACTCT | GCGAGTGAGGTAGCGGTAAA  | AACTCGAGAAAGAATTC |
| H19 DMR                             | chr11:2,021,040-2,021,101   | GGGTCATCTGGGAATAGGACACT | GGATAATGCCCGACCTGAAG  | ATGGGAGCCGCACCA   |
| Ctr1_PRR15_promoter                 | chr7:29,603,474-29,603,528  | TGCCCCAGGGTTCTGGTT      | CTGCCACCTGCTGGTTATT   | CCCGAATCACTTGGC   |
| Ctr2_HOXC5_outside of 3' CpG island | chr12:54,428,980-54,429,039 | CACTGGACCCCAGCAAGTG     | TTCGTGGCAGGGACTATGG   | CTAGAGGCCCTTGC    |

Supplemental Table 5. Primer sequences used to generate plasmids for luciferase reporter assays

| Constructs                                 | Primer sets         | Primer seq                            | size(bp) | NCBI36/hg18 location    |
|--------------------------------------------|---------------------|---------------------------------------|----------|-------------------------|
| <b>Promoter or Enhancer Assays</b>         |                     |                                       |          |                         |
| PRR15-Pro: promoter assay positive control | Prr15-pro-F(NheI)   | CTAGCTAGCATGCCCTGTGCCAATATC           | 1091     | chr7:29568861-29569951  |
|                                            | Prr15-pro-R(XhoI)   | CAACTCGAGAGGTGCAGGTAGGAACTT           |          |                         |
| Pro-Luc: enhancer assay negative control   | En-F(SacI)          | ATAATAGAGCTCAGTTATTAATAGTAATCAATTACGG |          |                         |
|                                            | En-R (NheI)         | TATTATGCTAGCCAAAACAAACTCCCATTG        |          |                         |
| CMV-Enh: enhancer assay positive control   | CMV-PRO-F(XhoI)     | ATAATACTCGAGGCACCAAAATCAACGG          |          |                         |
|                                            | CMV-PRO-R(HindIII)  | TATTATAAGCTTCGCTAGCGGATCTGAC          |          |                         |
| PRR15-3'CGI-forward                        | bl-920-F (NheI)     | ATAATA GCTAGC GTCCTTCTCTCCTACTGG      | 920      | chr7:29571718-29572637  |
|                                            | bl-920-R (XhoI)     | TATTATCTCGAG GAGCTGCTGGTCCAGTC        |          |                         |
| PRR15-3'CGI-reverse                        | bl-920R-F (XhoI)    | ATAATA CTCGAG GTCCTTCTCTCCTACTGG      | 920      | chr7:29605193-29606112  |
|                                            | bl-920R-R (SacI)    | TATTAT GAGCTC GAGCTGCTGGTCCAGTC       |          |                         |
| mHic1-3'CGI-forward                        | Hic1-F(SacI)        | ATAATA GAGCTC AGCTACCTGCAGATCCCTGA    | 2155     | chr11:74978530-74980684 |
|                                            | Hic1-R(XhoI)        | TATTAT CTCGAG CACAGTGAGAATGGGTGTGG    |          |                         |
| mHic1-3'CGI-reverse                        | Hic1R-2k-F(XhoI)    | ATAATA CTCGAG AGCTACCTGCAGATCCCTGA    | 2155     | chr11:74978530-74980684 |
|                                            | Hic1R-2k-R(SacI)    | TATTAT GAGCTC CACAGTGAGAATGGGTGTGG    |          |                         |
| <b>Enhancer-Blocker Assays</b>             |                     |                                       |          |                         |
| PRR15-3'CGI-forward                        | bl-920-F(BamHI)     | ATAATA GGATCC GTCCTTCTCTCCTACTGGGATA  | 920      | chr7:29571718-29572637  |
|                                            | bl-920-R(HindIII)   | TATTAT AAGCTT GAGCTGCTGGTCCAGTC       |          |                         |
| PRR15-3'CGI-reverse                        | bl-920R-F(HindIII)  | TATTAT AAGCTT GTCCTTCTCTCCTACTGGGATA  | 920      | chr7:29605193-29606112  |
|                                            | bl-920R-R(BamHI)    | ATAATA GGATCC GAGCTGCTGGTCCAGTC       |          |                         |
| mHic1-3'CGI-forward                        | bl-Hic1-F(BglII)    | ATAATA AGATCT AGCTACCTGCAGATCCCTGA    | 2155     | chr11:74978530-74980684 |
|                                            | bl-Hic1-R(HindIII)  | TATTAT AAGCTT CACAGTGAGAATGGGTGTGG    |          |                         |
| mHic1-3'CGI-reverse                        | bl-Hic1R-F(HindIII) | ATAATA AAGCTT AGCTACCTGCAGATCCCTGA    | 2155     | chr11:74978530-74980684 |
|                                            | bl-Hic1R-R(BglII)   | TATTAT AGATCT CACAGTGAGAATGGGTGTGG    |          |                         |

Supplemental Table 6. Differential methylation identified in hESCs after random differentiation

|                           | Regions analyzed | Gain of methylation | Loss of methylation |
|---------------------------|------------------|---------------------|---------------------|
| Total                     | 83927            | 2187 (2.6%)         | 1660 (2.0%)         |
| CpG island associated     | 32301            | 1124 (3.5%)         | 201 (0.6%)          |
| Non-CpG island associated | 51626            | 1063 (2.1%)         | 1459 (2.8%)         |

Based on genome-wide methylation analysis in both H1 and H13 cell lines.

Significant methylation changes were identified in four biological replicates at either day 21 or day 90.
